# Supplementary material for: The effects of muscle coactivation patterns on gait, muscle strength and symptoms in different stages of knee osteoarthritis
Source: Research Square preprint supplement (doi:10.21203/rs.3.rs-8755689/v1), 2026-02-18
Supplement: Supplementary file 1 [file 330e7cfbf0c40cb56383df69.docx]

Table S1. Correlation analysis of parameters and WOMAC scores on the affected side

| Parameters | WOMAC Pain  r | WOMAC Stiffness  r | WOMAC Function  r |
| --- | --- | --- | --- |
|
| BMI | 0.214 | 0.103 | 0.069 |
| Gait analysis | | | |
| Speed | -0.463 | -0.159 | -0.580 |
| Cadence | -0.038 | -0.024 | -0.109 |
| Step length | -0.183 | -0.262 | -0.378 |
| Stance time | 0.380 | 0.148 | 0.075 |
| ROM-hip | -0.306 | -0.263 | -0.198 |
| ROM-knee | -0.391 | -0.542 | -0.557 |
| ROM-ankle | -0.030 | -0.058 | -0.288 |
| Peak KFM | -0.477 | -0.565 | -0.448 |
| Peak KAM | 0.532 | 0.304 | 0.184 |
| KAM impulse | 0.584 | 0.294 | 0.263 |
| MoS-AP | -0.084 | -0.367 | -0.051 |
| MoS-ML | -0.019 | -0.056 | -0.087 |
| Isokinetic muscle strength test | | | |
| APTe | -0.040 | -0.122 | -0.368 |
| PTAe | -0.267 | -0.380 | -0.089 |
| TPTe | 0.031 | 0.108 | 0.144 |
| APe | -0.189 | -0.024 | -0.038 |
| APTf | -0.218 | -0.328 | -0.375 |
| PTAf | 0.298 | 0.393 | 0.305 |
| TPTf | 0.194 | 0.257 | 0.278 |
| APf | -0.153 | -0.157 | -0.273 |
| H/Q | 0.370 | 0.361 | 0.451 |
| sEMG combined with gait analysis | | | |
| Early stance phase | | | |
| LH/VL | 0.576 | 0.305 | 0.127 |
| MH/VM | 0.107 | 0.129 | 0.226 |
| LH/MH | 0.307 | 0.221 | 0.232 |
| VM/VL | 0.443 | 0.117 | 0.270 |
| LH+MH/*LH+MH* | 0.433 | 0.488 | 0.275 |
| VM+VL/*VM+VL* | 0.081 | 0.212 | 0.128 |
| Mid-stance phase | | | |
| LH/VL | 0.291 | 0.108 | 0.270 |
| MH/VM | 0.022 | 0.176 | 0.217 |
| LH/MH | 0.216 | 0.135 | 0.205 |
| VM/VL | 0.109 | 0.185 | 0.194 |
| LH+MH/*LH+MH* | 0.406 | 0.410 | 0.248 |
| VM+VL/*VM+VL* | 0.422 | 0.446 | 0.296 |
| Late stance phase | | | |
| LH/VL | 0.408 | 0.272 | 0.244 |
| MH/VM | 0.063 | 0.189 | 0.014 |
| LH/MH | 0.299 | 0.145 | 0.071 |
| VM/VL | 0.088 | 0.159 | 0.011 |
| LH+MH/*LH+MH* | 0.461 | 0.238 | 0.401 |
| VM+VL/*VM+VL* | 0.159 | 0.369 | 0.064 |
| Late swing phase |  |  |  |
| LH/VL | 0.365 | 0.177 | 0.244 |
| MH/VM | 0.141 | 0.033 | 0.159 |
| LH/MH | 0.242 | 0.229 | 0.233 |
| VM/VL | 0.130 | 0.201 | 0.113 |
| LH+MH/*LH+MH* | 0.449 | 0.388 | 0.266 |
| VM+VL/*VM+VL* | 0.074 | 0.187 | 0.428 |
| sEMG combined with isokinetic muscle strength test | | | |
| VM/VLe | -0.286 | -0.088 | -0.108 |
| MH/LHe | -0.116 | -0.150 | -0.020 |
| MH+LH/VM+VLe | 0.414 | 0.195 | 0.023 |
| MH/*MH*e | 0.105 | 0.219 | 0.059 |
| LH/*LH*e | 0.399 | 0.256 | 0.262 |
| VM/VLf | -0.024 | -0.148 | -0.142 |
| MH/LHf | -0.046 | -0.209 | -0.140 |
| VM+VL/MH+LHf | 0.117 | 0.243 | 0.121 |
| VM/*VM*f | 0.227 | 0.271 | 0.170 |
| VL/*VL*f | 0.368 | 0.047 | 0.008 |

e and f respectively represent the extension and flexion phases of the knee during the isokinetic muscle strength test. *Indicates a significant correlation at P < 0.05

Table S2. Multivariate regression analysis between various examination parameters and WOMAC scores

| Parameters | *B* | *β* | *P* value | 95%CI |
| --- | --- | --- | --- | --- |
| WOMAC-pain regression model | | | |  |
| Speed | -3.084 | -0.157 | 0.002 | -4.617，-1.551 |
| Peak KAM | 3.385 | 0.982 | ＜0.001 | 1.661，5.109 |
| LH/VL - Early stance | 7.350 | 0.418 | 0.005 | 3.588，11.112 |
| LH+MH/*LH+MH -* Early stance | 5.217 | 0.218 | 0.017 | 1.244，9.190 |
| VM/VL - Early stance | 5.010 | 0.266 | 0.026 | 0.999，9.021 |
| VM+VL/*VM+VL* -Mid-stance | 3.725 | 0.104 | 0.038 | 1.080，6.370 |
| LH+MH/*LH+MH* -late stance | 4.783 | 0.140 | 0.011 | 1.407，8.159 |
| LH/*LH*e | 5.833 | 0.163 | 0.043 | 0.698，10.968 |
| WOMAC-stifness regression model | | | | |
| ROM-knee | -0.085 | -0.468 | ＜0.001 | -0.129，-0.041 |
| Peak KFM | -0.135 | -0.068 | ＜0.001 | -0.197，-0.073 |
| LH+MH/*LH+MH -* Early stance | 5.270 | 0.391 | 0.009 | 1.894，8.646 |
| VM+VL/*VM+VL -* Mid-stance | 6.778 | 0.338 | 0.016 | 2.126，11.430 |
| VM+VL*/VM+VL -* Late stance | 8.534 | 0.379 | 0.031 | 1.800，15.268 |
| *LH+MH/LH+MH -* Late swing | 4.686 | 0.213 | 0.005 | 1.728，7.644 |
| WOMAC-function regression model | | | | |
| Speed | -5.388 | -0.105 | 0.021 | -8.718，-2.058 |
| ROM-knee | -0.629 | -0.743 | 0.003 | -1.039，-0.219 |
| Step length | -4.667 | -0.049 | 0.021 | -7.634，-1.700 |
| Peak KFM | -8.314 | -0.899 | 0.032 | -14.162，-2.466 |
| APTe | -6.572 | -0.238 | 0.046 | -12.698，-0.446 |
| H/Q | 1.033 | 0.857 | 0.013 | 0.330，1.736 |
| LH+MH/*LH+MH* - Late stance | 6.480 | 0.072 | 0.025 | 2.608，10.352 |
| VM+VL/*VM+VL* - Late swing | 5.416 | 0.079 | 0.043 | 0.608，10.224 |

e and f respectively represent the extension and flexion phases of the knee during the isokinetic muscle strength test. CI, confidence interval.

Table S3. Correlation analysis of gait parameters and sEMG parameters on the affected side

| Parameters | Speed | Cadence | Step length | Stance time | ROM-hip | ROM-knee | ROM-ankle | Peak KFM | Peak KAM | KAM impulse | MoS-AP | MoS-ML |
| --- | --- | --- | --- | --- | --- | --- | --- | --- | --- | --- | --- | --- |
| Early stance phase | | | | | | | | | | | | |
| LH/VL | -0.246 | -0.088 | -0.112 | 0.154 | -0.194 | -0.211 | -0.057 | -0.304 | 0.598 | 0.615 | -0.313 | -0.315 |
| MH/VM | -0.082 | -0.220 | -0.164 | 0.074 | -0.254 | -0.250 | -0.007 | -0.210 | 0.017 | 0.219 | -0.170 | -0.154 |
| LH/MH | -0.082 | -0.226 | -0.314 | 0.144 | -0.120 | -0.173 | -0.060 | -0.296 | 0.405 | 0.385 | -0.189 | -0.170 |
| VM/VL | -0.017 | -0.107 | -0.056 | 0.324 | -0.044 | -0.26 | -0.137 | -0.126 | 0.165 | 0.014 | -0.249 | -0.148 |
| LH+MH/LH+MH | -0.24 | -0.062 | -0.123 | 0.078 | -0.230 | -0.119 | -0.099 | -0.454 | 0.492 | 0.470 | -0.102 | -0.140 |
| VM+VL/VM+VL | -0.109 | -0.247 | -0.217 | 0.097 | -0.070 | -0.194 | -0.112 | -0.455 | 0.258 | 0.075 | -0.180 | -0.222 |
| Mid-stance phase | | | | | | | | | | | | |
| LH/VL | -0.272 | -0.223 | -0.253 | 0.279 | -0.103 | -0.041 | -0.208 | -0.284 | 0.124 | 0.319 | -0.244 | -0.262 |
| MH/VM | -0.188 | -0.112 | -0.004 | 0.194 | -0.062 | -0.026 | -0.225 | -0.192 | 0.087 | 0.084 | -0.168 | -0.184 |
| LH/MH | -0.329 | - 0.285 | -0.073 | 0.335 | -0.163 | -0.025 | -0.094 | -0.203 | 0.219 | 0.263 | -0.229 | -0.198 |
| VM/VL | 0.164 | 0.241 | 0.133 | -0.127 | 0.224 | 0.221 | 0.037 | 0.202 | -0.011 | -0.245 | 0.099 | 0.066 |
| LH+MH/*LH+MH* | -0.282 | -0.429 | -0.105 | 0.367 | -0.071 | -0.376 | -0.152 | -0.285 | 0.277 | 0.297 | -0.029 | -0.153 |
| VM+VL/*VM+VL* | -0.463 | -0.481 | -0.134 | 0.483 | -0.107 | -0.235 | -0.186 | -0.114 | 0.187 | 0.139 | -0.239 | -0.219 |
| Late stance phase | | | | | | | | | | | | |
| LH/VL | -0.325 | -0.266 | -0.276 | 0.353 | -0.162 | -0.031 | -0.135 | -0.179 | 0.158 | 0.172 | -0.095 | -0.277 |
| MH/VM | -0.311 | -0.232 | -0.184 | 0.195 | -0.175 | -0.142 | -0.138 | -0.290 | 0.297 | 0.121 | -0.118 | -0.168 |
| LH/MH | -0.330 | -0.101 | -0.259 | 0.273 | -0.218 | -0.193 | -0.111 | -0.267 | 0.151 | 0.278 | -0.129 | -0.199 |
| VM/VL | -0.044 | -0.220 | -0.147 | 0.18 | -0.166 | -0.086 | -0.066 | -0.148 | 0.216 | 0.156 | -0.109 | -0.203 |
| LH+MH/*LH+MH* | -0.404 | -0.119 | -0.216 | 0.370 | -0.174 | -0.251 | -0.157 | -0.326 | 0.253 | 0.064 | -0.252 | -0.328 |
| VM+VL/*VM+VL* | -0.366 | -0.429 | -0.204 | 0.372 | -0.116 | - 0.310 | -0.083 | -0.291 | 0.261 | 0.128 | -0.280 | -0.237 |
| Late swing phase | | | | | | | | | | | | |
| LH/VL | -0.209 | -0.153 | -0.298 | 0.207 | -0.084 | -0.316 | -0.034 | -0.185 | 0.206 | 0.227 | -0.321 | -0.147 |
| MH/VM | 0.233 | 0.234 | 0.292 | 0.165 | 0.028 | 0.169 | 0.155 | 0.186 | 0.130 | 0.160 | 0.287 | 0.302 |
| LH/MH | -0.293 | -0.132 | -0.288 | 0.220 | -0.161 | -0.309 | -0.092 | -0.218 | 0.323 | 0.285 | -0.159 | -0.281 |
| VM/VL | 0.239 | 0.275 | 0.289 | 0.158 | 0.181 | 0.317 | 0.156 | 0.154 | 0.281 | 0.022 | 0.271 | 0.171 |
| LH+MH/*LH+MH* | -0.264 | -0.183 | -0.365 | 0.102 | -0.125 | -0.305 | -0.192 | -0.203 | 0.301 | 0.192 | -0.378 | -0.145 |
| VM+VL/*VM+VL* | -0.205 | -0.266 | -0.551 | 0.118 | -0.104 | -0.386 | -0.215 | -0.132 | 0.238 | 0.228 | -0.301 | -0.255 |

*Indicates a significant correlation at P < 0.05

Table S4. Correlation analysis of isokinetic muscle strength parameters and sEMG parameters on the affected side

| Parameters | APTe | PTAe | TPTe | APe | APTf | PTAf | TPTf | APf | H/Q |
| --- | --- | --- | --- | --- | --- | --- | --- | --- | --- |
| VM/VLe | 0.325 | 0.216 | -0.197 | 0.156 | 0.240 | -0.148 | -0.198 | 0.278 | -0.056 |
| MH/LHe | 0.022 | 0.141 | -0.165 | 0.068 | 0.104 | -0.224 | -0.102 | 0.197 | -0.075 |
| MH+LH/VM+VLe | -0.575 | -0.388 | 0.319 | -0.119 | -0.166 | 0.091 | 0.126 | -0.109 | 0.360 |
| MH/*MHe* | - 0.494 | -0.162 | 0.174 | -0.200 | -0.031 | 0.347 | 0.212 | -0.287 | 0.299 |
| LH/*LHe* | -0.539 | -0.392 | 0.399 | -0.087 | -0.308 | 0.013 | 0.089 | -0.261 | 0.230 |
| VM/VLf | 0.266 | 0.262 | -0.325 | 0.104 | 0.461 | -0.061 | -0.082 | 0.296 | -0.226 |
| MH/LHf | 0.092 | 0.086 | -0.183 | 0.118 | 0.093 | -0.227 | -0.071 | 0.155 | -0.283 |
| VM+VL/MH+LHf | -0.025 | -0.065 | 0.074 | -0.118 | -0.482 | 0.430 | 0.310 | -0.146 | 0.406 |
| VM/*VMf* | -0.214 | -0.203 | 0.014 | -0.104 | -0.046 | 0.186 | 0.174 | -0.207 | 0.227 |
| VL/*VLf* | -0.053 | -0.086 | 0.188 | -0.137 | -0.484 | 0.454 | 0.324 | -0.254 | 0.294 |

e and f respectively represent the extension and flexion phases of the knee during the isokinetic muscle strength test. *Indicates a significant correlation at P < 0.05

Table S5. Multivariate regression analysis between gait, muscle strength and muscle activation

| Parameters | *B* | *β* | *P* value | 95% CI |
| --- | --- | --- | --- | --- |
| Speed regression model | | | |  |
| VM+VL/*VM+VL* **-** Mid-stance | -1.787 | -0.984 | 0.023 | -2.837，-0.737 |
| LH+MH/*LH+MH* **-** Late stance | -1.652 | -0.947 | 0.036 | -2.716，-0.588 |
| VM+VL/*VM+VL -* Late stance | -1.330 | -0.653 | 0.010 | -2.293，-0.367 |
| Cadence regression model |  |  |  |  |
| LH+MH/*LH+MH -* Mid-stance | -14.896 | -0.144 | 0.007 | -21.940，-7.852 |
| VM+VL/*VM+VL* - Mid-stance | -35.249 | -0.422 | 0.026 | -54.626，-15.872 |
| VM+VL/*VM+VL* - Late stance | -23.645 | -0.252 | 0.005 | -36.867，-10.423 |
| LH+MH/*LH+MH -* Late swing | -0.857 | -0.797 | 0.039 | -1.478，-0.236 |
| VM+VL/*VM+VL* - Late swing | -0.651 | -0.909 | 0.025 | -1.104，-0.198 |
| Stance time regression model | | | | |
| LH+MH/*LH+MH* - Mid-stance | 5.351 | 0.101 | 0.027 | 1.543，9.159 |
| VM+VL/*VM+VL* - Mid-stance | 6.604 | 0.155 | 0.003 | 3.580，9.628 |
| LH+MH/*LH+MH* - Late stance | 8.823 | 0.215 | 0.035 | 3.097，14.549 |
| VM+VL/*VM+VL* - Late stance | 6.067 | 0.127 | 0.005 | 2.829，9.305 |
| ROM-kneeregression model | | | | |
| LH+MH/*LH+MH -* Mid-stance | -27.336 | -0.200 | 0.012 | -43.451，-11.221 |
| VM+VL/*VM+VL -* Late swing | -30.762 | -0.381 | 0.005 | -46.305，-15.219 |
| Peak KFM regression model | | | | |
| LH+MH/*LH+MH -* Early stance | -6.531 | -0.963 | 0.038 | -11.254，-1.808 |
| VM+VL/*VM+VL -* Early stance | -4.115 | -0.665 | 0.028 | -7.078，-1.152 |
| Peak KAM regression model | | | | |
| LH/VL - Early stance | 5.033 | 0.987 | 0.004 | 2.302，7.764 |
| LH/MH - Early stance | 2.052 | 0.919 | 0.013 | 0.807，3.297 |
| LH+MH/*LH+MH* - Early stance | 1.236 | 0.178 | 0.018 | 0.426，2.046 |
| KAM impulse regression model | | | | |
| LH/VL - Early stance | 2.615 | 0.962 | 0.015 | 0.912，4.318 |
| LH/MH - Early stance | 1.174 | 0.987 | 0.012 | 0.300，2.048 |
| LH+MH/*LH+MH* - Early stance | 1.607 | 0.434 | 0.008 | 0.783，2.431 |
| MoS-AP regression model | | | | |
| LH+MH/*LH+MH -* Late swing | -0.528 | -0.810 | 0.015 | -0.900，-0.156 |
| APTe regression model | | | | |
| MH+LH/VM+VLe | -5.308 | -1.087 | 0.013 | -8.953，-1.663 |
| APTf regression model | | | | |
| VM/VLf | 1.217 | 0.889 | 0.038 | 0.341，2.093 |
| VM+VL/MH+LHf | -1.259 | -0.782 | 0.020 | -2.394，-0.124 |
| VL/*VL*f | -1.143 | -0.521 | 0.047 | -2.252，-0.034 |
| H/Q regression model | | | | |
| MH+LH/VM+VLe | 23.053 | 0.206 | 0.022 | 4.746，41.360 |
| VM+VL/MH+LHf | 30.471 | 0.561 | 0.031 | 8.106，52.836 |

e and f respectively represent the extension and flexion phases of the knee during the isokinetic muscle strength test. CI, confidence interva
